# Supplementary material
Source: PubMed Central journal article supplement (PMC7161041)
Supplement: ao0c00096_si_001.pdf [file ao0c00096_si_001.pdf]

## Oxidative-Extractive Desulfurization of Model Fuels Using a Pyridinium Ionic Liquid

Hanan Mohamed<sup>a</sup>, Shofiur Rahman<sup>b</sup>, Syed Ahmad Imtiaz<sup>a</sup>, Yan Zhang<sup>a</sup>

<sup>a</sup> Faculty of Engineering and Applied Science, Memorial University of Newfoundland, St John's, NL, A1B 3X5

<sup>b</sup> Aramco Laboratory for Applied Sensing Research, King Abdullah Institute for Nanotechnology, King Saud University, Riyadh 11451, Saudi Arabia

### <sup>1</sup>H-NMR and <sup>13</sup>C-NMR analyses of the synthesis ionic liquid [BPy][BF<sub>4</sub>]

The ionic liquid [BPy][BF<sub>4</sub>] has 14 hydrogens and 9 carbons, and its NMR spectra were reported as chemical shift in ppm ( $\delta$ ) from the internal standard. The results of <sup>1</sup>H-NMR and <sup>13</sup>C-NMR of [BPy][BF<sub>4</sub>] in this work are given in Tables S1 and S2. Our results are consistent with those reported in the open literature,<sup>1,2</sup> confirming the molecular structure and conformation of [BPy][BF<sub>4</sub>].

Table S1: Comparison of <sup>1</sup>H-NMR chemical shifts of [BPy][BF<sub>4</sub>] with references

| H position                  | Chemical shift <sup>2</sup><br>(ppm) | Chemical shift (Present work)<br>(ppm) |
|-----------------------------|--------------------------------------|----------------------------------------|
| 10; (3H), CH <sub>3</sub>   | 0.90 (triplet)                       | 0.86 (triplet)                         |
| 9; (2H), CH <sub>2</sub>    | 1.30 (multiplet)                     | 1.27 (quartet)                         |
| 8; (2H), CH <sub>2</sub>    | 1.90 (multiplet)                     | 1.90 (quartet)                         |
| 7; (2H), NCH <sub>2</sub>   | 4.59 (triplet)                       | 4.70 (triplet)                         |
| 3,5; (2H), aromatic protons | 8.14 (multiplet)                     | 8.16 (triplet)                         |
| 4; (1H), aromatic proton    | 8.59 (multiplet)                     | 8.62 (triplet)                         |
| 2,6; (2H), aromatic protons | 9.04 (multiplet)                     | 9.16 (doublet)                         |

Table S2: Comparison of  $^{13}\text{C}$ -NMR chemical shifts of [BPy][BF<sub>4</sub>] with references

| C position                 | Chemical shift <sup>2</sup><br>(ppm) | Chemical shift (Present work)<br>(ppm) |
|----------------------------|--------------------------------------|----------------------------------------|
| 10; (1C), CH <sub>3</sub>  | 13.23                                | 13.14                                  |
| 9; (1C), CH <sub>2</sub>   | 18.66                                | 18.60                                  |
| 8; (1C), NCH <sub>2</sub>  | 32.57                                | 32.57                                  |
| 7; (1C), NCH <sub>2</sub>  | 60.56                                | 60.45                                  |
| 3,4 (2C), aromatic proton  | 128.03                               | 127.99                                 |
| 2,6 (2C), aromatic protons | 144.58                               | 144.59                                 |
| 4 (1C), aromatic protons   | 145.43                               | 145.41                                 |

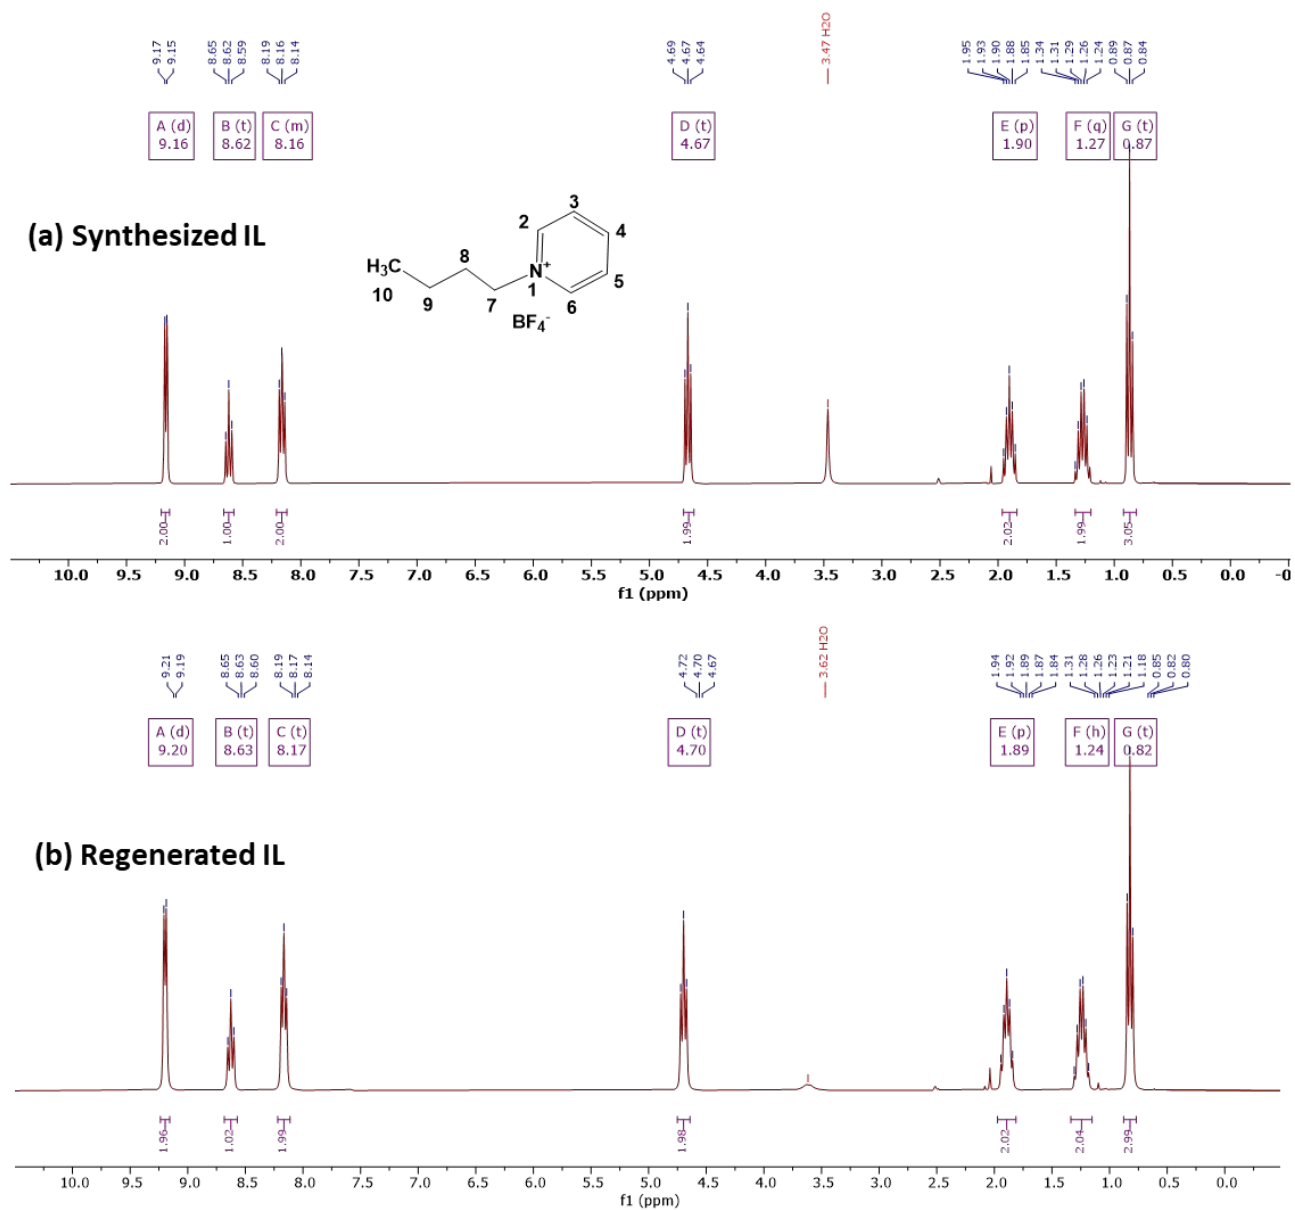

Figure S1:  $^1\text{H-NMR}$  (300 MHz,  $\text{DMSO-}d_6$ ) spectrums of (a) the synthesized and (b) regenerated ionic liquid (IL)  $[\text{BPy}][\text{BF}_4]$ .

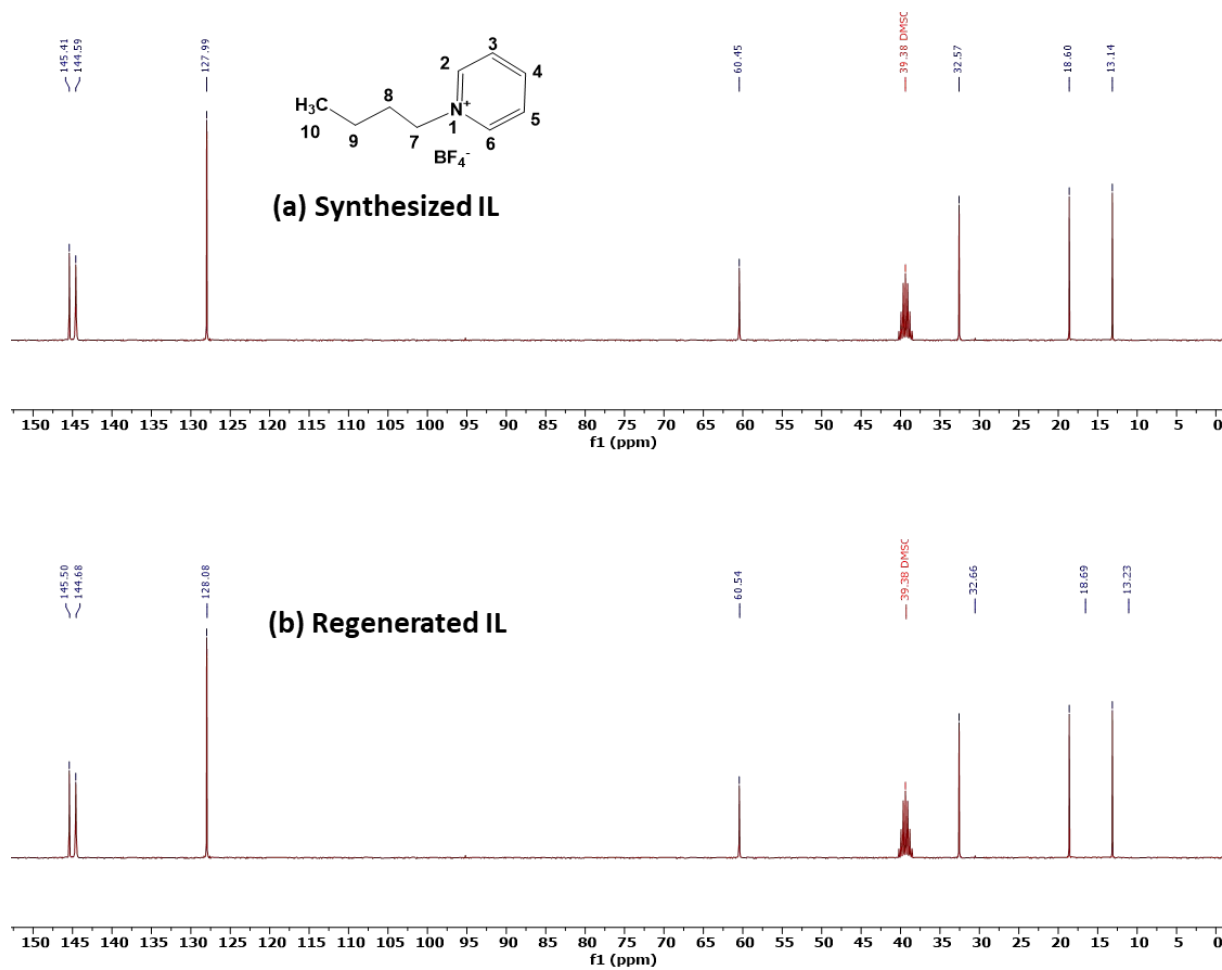

Figure S2: <sup>13</sup>C-NMR (75 MHz, DMSO-*d*<sub>6</sub>) spectrums of (a) the synthesized and (b) regenerated ionic liquid (IL) [BPy][BF<sub>4</sub>].

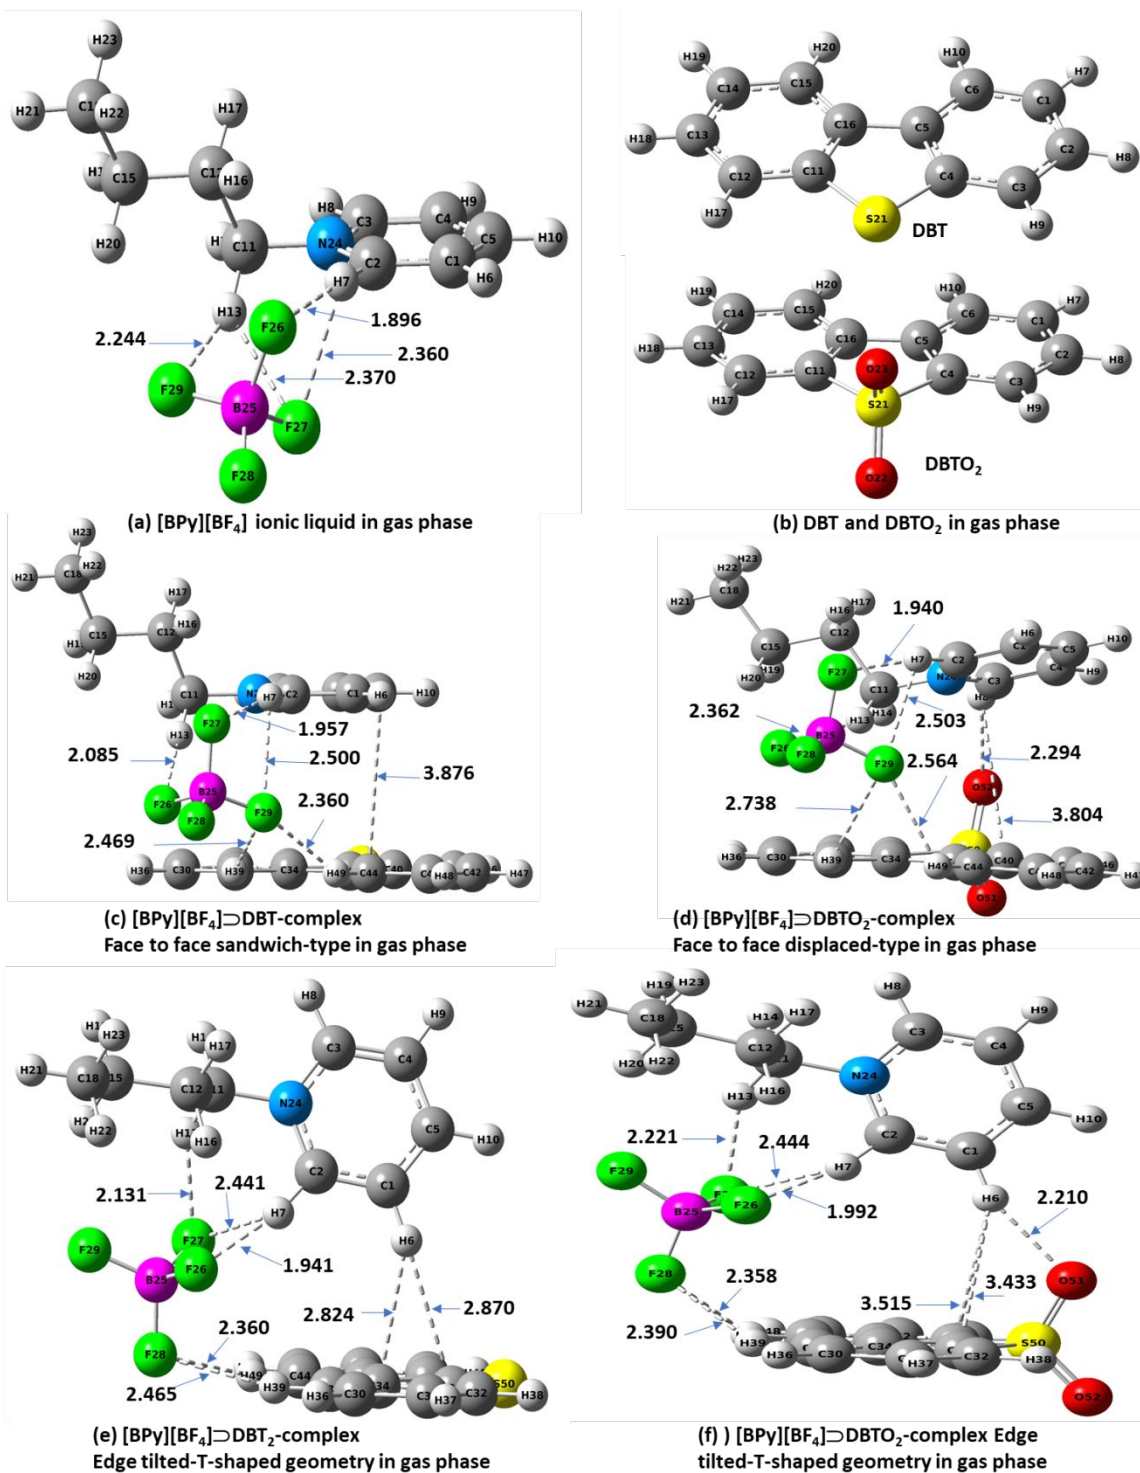

Figure S3. The geometry optimized structures of (a) [BPy][BF<sub>4</sub>]; (b) dibenzothiophene (DBT), dibenzothiophene sulfone (DBTO<sub>2</sub>); (c) & (e) ([BPy][BF<sub>4</sub>]⊃DBT; and (d) & (f) ([BPy][BF<sub>4</sub>]⊃DBTO<sub>2</sub>) in gas phase. Color code: carbon = grey; hydrogen= white; nitrogen= blue; oxygen = red; sulfur = yellow, boron = magenta and fluorine = green.

## FT-IR analysis of [BPy][BF<sub>4</sub>]

Molecular structure of [BPy][BF<sub>4</sub>] was characterized by FT-IR with the IR spectrum of [BPy][BF<sub>4</sub>] being shown in Figure S4. Small band at 3618 cm<sup>-1</sup> is characteristic of traces of water present in the sample. The peaks at 3071 and 2937 cm<sup>-1</sup> are indicative of C–H stretching vibrations, representing hybridizations of sp<sup>2</sup> (aromatic) and sp<sup>3</sup> (aliphatic) respectively. Peaks at 1709 and 1636 cm<sup>-1</sup> are the characteristic overtone bands for aromatic rings. Bands at 1583, 1489 and 1468 cm<sup>-1</sup> are attributed to the aromatic C=C stretching vibrations. In the region of the fingerprint, there are flexion bands for sp<sup>3</sup> C–H at 1455 and 1364 cm<sup>-1</sup>. Peaks at 1223, 1174, 1047 and 1034 cm<sup>-1</sup> are due to the coalescence of aromatic stretching and sp<sup>3</sup> C–H bending, whereas sharp peaks at 771 and 685 cm<sup>-1</sup> are assigned to the aromatic sp<sup>2</sup> C–H bending. The IR data of [BPy][BF<sub>4</sub>] synthesized in this work are consistent with those reported elsewhere.<sup>2</sup>

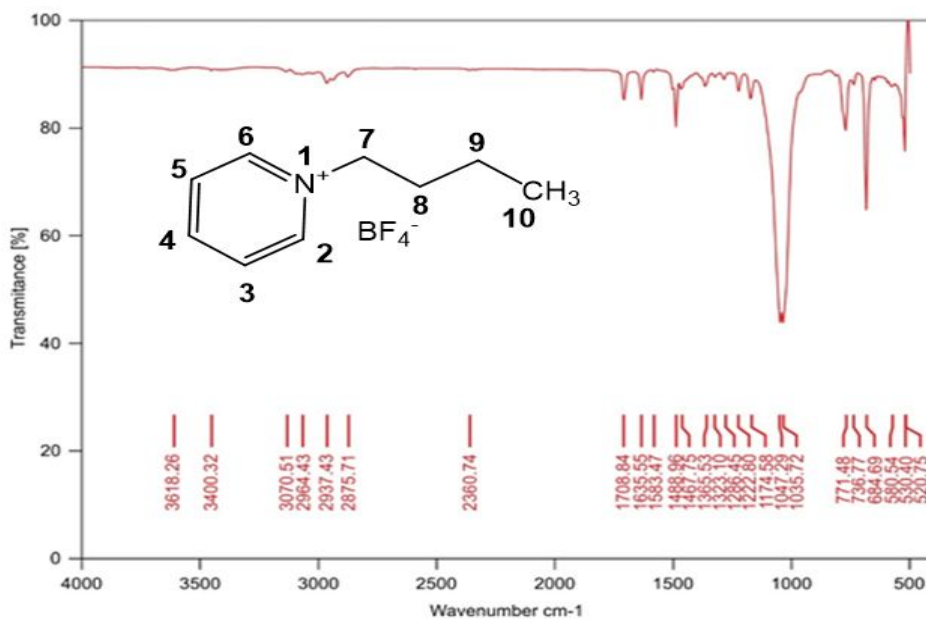

Figure S4. FT-IR spectrum of [BPy]BF<sub>4</sub>

## References:

- (1) D. Zhao, Y. Wang, E. Duan, Oxidative desulfurization of fuel oil by pyridinium-based ionic liquids, *Molecules* **2009**, *14*, 4351–4357.
- (2) M. Enayati, H. Faghihian, *N*-butyl-pyridinium tetrafluoroborate as a highly efficient ionic liquid for removal of dibenzothiophene from organic solutions, *J. Fuel Chem. Technol.* **2015**, *43*, 195–201.
